# Supplementary material for: Alcohol and cannabis consumption in patients with inflammatory bowel disease: prevalence, pattern of consumption and impact on the disease
Source: PubMed Central journal article supplement — Eur J Gastroenterol Hepatol. 2022 Oct 26;35(1):21–30. doi: 10.1097/MEG.0000000000002453 (PMC9719838; doi:10.1097/meg.0000000000002453), 2022-10-26
Supplement: ejgh-35-021-s001.pdf [file ejgh-35-021-s001.pdf]

1 **Table 1. Prevalence of Alcohol and cannabis consumption in the SIBDCS and the general**  
 2 **Swiss population**

| Prevalence of Alcohol and cannabis consumption in the Swiss IBD cohort and the general Swiss population |                  |                    |
|---------------------------------------------------------------------------------------------------------|------------------|--------------------|
| Substance                                                                                               | Swiss IBD cohort | General population |
| <b>Alcohol (at least 1x weekly)</b>                                                                     | 43.1%            | 50.9%              |
| -per 100'000 inhabitants                                                                                | 43'090           | 50'900             |
| Gender distribution                                                                                     |                  |                    |
| men                                                                                                     | 54.9%            | 61.0%              |
| women                                                                                                   | 31.8%            | 41.2%              |
| -according to IBD subtypes                                                                              |                  |                    |
| Crohn's disease                                                                                         | 39.8%            |                    |
| Ulcerative colitis                                                                                      | 47.5%            |                    |
| <b>Cannabis (at least once consumed)</b>                                                                | 19.5%            | 30%                |
| -per 100'000 inhabitants                                                                                | 19'446           | 30'000             |
| -active users                                                                                           | 6.1%             |                    |
| -previous users subgroups                                                                               | 13.4%            |                    |
| -active users, according to IBD subtypes                                                                | 7%               |                    |
| Crohn's disease                                                                                         | 5%               |                    |

ulcerative colitis

**Other drugs :**

|                      |        |
|----------------------|--------|
| cocaine              | 0.08 % |
| heroin               | 0.08 % |
| methadone            | 0.08 % |
| amphetamines         | 0.92 % |
| crystal meth         | 0.17 % |
| LSD, PCP, 2-CB, 2-CI | 0.84 % |
| Ecstasy, MDMA        | 1.93 % |
| Ketamine (Special K) | 0.17 % |

3

4

5 **Table 2: Patient characteristics according to alcohol drinking pattern and cannabis**  
 6 **consumption.**

|                                                  | <b>Non drinkers<br/>(N=390)</b> | <b>Low to moderate drinkers<br/>(N=314)</b> | <b>Heavy drinkers<br/>(N=18)</b> | <b>Cannabis user<br/>(N=133)</b> | <b>Whole Swiss IBD cohort<br/>(N=722)</b> | <b>Comparison among groups</b> |
|--------------------------------------------------|---------------------------------|---------------------------------------------|----------------------------------|----------------------------------|-------------------------------------------|--------------------------------|
| <b>Age (median + IQR)</b>                        | 50 (40-60)                      | 54 (45-65)                                  | 72 (62-75)                       | 43 (35-52)                       | 51 (40-61)                                | <b>&lt;0.001</b>               |
| <b>Female (%)</b>                                | 258 (66%)                       | 129 (41%)                                   | 5 (28%)                          | 65 (49%)                         | 392 (54%)                                 | <b>0.001</b>                   |
| <b>Male (%)</b>                                  | 132 (34%)                       | 185 (59%)                                   | 13 (72%)                         | 68 (51%)                         | 330 (46%)                                 |                                |
| <b>BMI [kg/m<sup>2</sup>]<br/>(median + IQR)</b> | 23<br>(20.7-26.2)               | 23<br>(21.1-25.5)                           | 26<br>(25-28.7)                  | 23<br>(20.8-24.8)                | 23<br>(20.9-25.8)                         | <b>0.0063</b>                  |
| <b>Associated addiction</b>                      |                                 |                                             |                                  |                                  |                                           |                                |

|                               |           |           |          |           |           |              |
|-------------------------------|-----------|-----------|----------|-----------|-----------|--------------|
| Current smoking (%)           | 78 (20%)  | 64 (20%)  | 4 (22%)  | 61 (46%)  | 146 (20%) | <b>0-001</b> |
| <b>Ethnicity</b>              |           |           |          |           |           |              |
| Caucasian (%)                 | 307 (79%) | 252 (80%) | 15 (83%) | 115 (86%) | 574 (80%) | 0.178        |
| Non-caucasian (%)             | 70 (18%)  | 50 (16%)  | 3 (17%)  | 13 (10%)  | 123 (17%) |              |
| <b>Marital status</b>         |           |           |          |           |           |              |
| Single (%)                    | 130 (33%) | 91 (30%)  | 0        | 71 (53%)  | 221 (31%) | <b>0-001</b> |
| Married (%)                   | 203 (52%) | 172 (55%) | 13 (72%) | 40 (30%)  | 388 (54%) | <b>0-001</b> |
| Widowed (%)                   | 8 (2%)    | 6 (2%)    | 1 (6%)   | 0         | 15 (2%)   | 0.248        |
| Divorced (%)                  | 25 (6%)   | 26 (8%)   | 4 (22%)  | 13 (10%)  | 55 (8%)   | 0.074        |
| Separated (%)                 | 6 (2%)    | 3 (1%)    | 0        | 2 (2%)    | 9 (1%)    | 0.861        |
| <b>Professional status</b>    |           |           |          |           |           |              |
| Disability (%)                | 34 (9%)   | 16 (5%)   | 2 (11%)  | 9 (7%)    | 52 (7%)   | 0.282        |
| Fulltime job (%)              | 142 (36%) | 168 (54%) | 4 (22%)  | 54 (41%)  | 314 (43%) | <b>0-001</b> |
| Part-time job (%)             | 117 (30%) | 72 (23%)  | 3 (17%)  | 34 (26%)  | 192 (27%) | 0.138        |
| Several partial-time jobs (%) | 13 (3%)   | 10 (3%)   | 0 (0%)   | 5 (4%)    | 23 (3%)   | 0.863        |
| Jobless (%)                   | 9 (2%)    | 3 (1%)    | 2 (11%)  | 3 (2%)    | 14 (2%)   | <b>0-026</b> |
| Student (%)                   | 40 (10%)  | 26 (8%)   | 1 (6%)   | 26 (20%)  | 67 (9%)   | <b>0-004</b> |
| Housewife (%)                 | 76 (20%)  | 39 (12%)  | 2 (11%)  | 13 (10%)  | 117 (16%) | <b>0-014</b> |
| Retired (%)                   | 50 (13%)  | 40 (13%)  | 8 (45%)  | 9 (7%)    | 98 (13%)  | <b>0-001</b> |

7

8

9

10

11

12

13

14

15

17 **Table 1: IBD patients' disease characteristics according to alcohol drinking pattern and**  
 18 **cannabis consumption**

|                                                | <b>Non drinkers<br/>N=390</b> | <b>Low to<br/>moderate<br/>drinkers<br/>N=314</b> | <b>Heavy<br/>drinkers<br/>N=18</b> | <b>Cannabis<br/>user<br/>N=133</b> | <b>Control<br/>group<br/>N=722</b> | <b>Comparison<br/>among<br/>groups</b> |
|------------------------------------------------|-------------------------------|---------------------------------------------------|------------------------------------|------------------------------------|------------------------------------|----------------------------------------|
| <b>Type of IBD</b>                             |                               |                                                   |                                    |                                    |                                    |                                        |
| Crohn's disease (%)                            | 212 (54%)                     | 164 (52%)                                         | 6 (33%)                            | 80 (60%)                           | 382 (53%)                          | <del>0-136</del>                       |
| Colitis ulcerosa (%)                           | 178 (46%)                     | 150 (45%)                                         | 12 (67%)                           | 53 (40%)                           | 340 (47%)                          |                                        |
| <b>Disease Activity<br/>(Median + IQR)</b>     |                               |                                                   |                                    |                                    |                                    |                                        |
| Crohn's Disease<br>Activity Index              | 66 (31-111)                   | 54 (26-98)                                        | 99 (34-197)                        | 70 (42-105)                        | 63 (31-107)                        | <del>0-288</del>                       |
| Modified Truelove & Witts<br>activity index    | 2(1-6)                        | 2(1-4)                                            | 2(1.5-3.5)                         | 3(1-5)                             | 2(1-5)                             | <del>0-199</del>                       |
| <b>Disease Location<br/>Crohn's disease</b>    |                               |                                                   |                                    |                                    |                                    |                                        |
| L1                                             | 63 (30%)                      | 42 (26%)                                          | 2 (33%)                            | 27 (34%)                           | 106 (28%)                          | <b>0-016</b>                           |
| L2                                             | 66 (31%)                      | 58 (35%)                                          | 2 (33%)                            | 3 (4%)                             | 125 (31%)                          |                                        |
| L3                                             | 71 (33%)                      | 51 (31%)                                          | 2 (33%)                            | 29 (36%)                           | 126 (33%)                          |                                        |
| L4 (in total)                                  | 12 (6%)                       | 13 (8%)                                           | 0 (0)                              | 8 (10%)                            | 27 (8%)                            |                                        |
| <b>Disease behavior<br/>(CD)</b>               |                               |                                                   |                                    |                                    |                                    |                                        |
| B1                                             | 96 (45%)                      | 83 (51%)                                          | 2(33%)                             | 45 (56%)                           | 181 (48%)                          | <del>0-465</del>                       |
| B2                                             | 48 (23%)                      | 29 (18%)                                          | 0 (0)                              | 13 (16%)                           | 77 (20%)                           |                                        |
| B3                                             | 68 (32%)                      | 52 (32%)                                          | 4(66%)                             | 22 (28%)                           | 124 (32%)                          |                                        |
| <b>Disease location<br/>Ulcerative colitis</b> |                               |                                                   |                                    |                                    |                                    |                                        |
| Pancolitis                                     | 68 (32%)                      | 41 (25%)                                          | 6 (50%)                            | 20 (38%)                           | 115 (34%)                          | <del>0-57</del>                        |
| Left-sided colitis                             | 69 (43%)                      | 75 (50%)                                          | 4 (33%)                            | 22 (41%)                           | 148 (44%)                          |                                        |
| Proctitis                                      | 34 (16%)                      | 30 (20%)                                          | 2 (17%)                            | 11 (21%)                           | 66 (20%)                           |                                        |
| <b>Anemia (%)</b>                              |                               |                                                   |                                    |                                    |                                    |                                        |
| Crohn's disease                                | 54 (27%)                      | 33 (22 %)                                         | 1 (20%)                            | 18 (23%)                           | 106 (24%)                          | <del>0-748</del>                       |
| Ulcerative colitis                             | 42 (26%)                      | 24 (18 %)                                         | 1 (9%)                             | 15 (32%)                           | 82 (23%)                           | <del>0-107</del>                       |
| <b>Extraintestinal<br/>manifestations</b>      |                               |                                                   |                                    |                                    |                                    |                                        |
| All IBD patients                               | 250 (64%)                     | 167 (53%)                                         | 13 (72%)                           | 103 (55%)                          | 407 (56%)                          | <del>0-020</del>                       |
| Crohn's disease                                | 152 (72%)                     | 94 (57%)                                          | 5 (83%)                            | 80 (60%)                           | 228 (60%)                          | <del>0-016</del>                       |
| Ulcerative colitis                             | 98 (55%)                      | 73 (49%)                                          | 8(67%)                             | 23 (43%)                           | 179 (53%)                          | <del>0-275</del>                       |

|                                                                          |           |           |          |                     |           |                  |
|--------------------------------------------------------------------------|-----------|-----------|----------|---------------------|-----------|------------------|
| <b>Current Therapy</b>                                                   |           |           |          |                     |           |                  |
| <u>Crohn disease</u>                                                     |           |           |          |                     |           |                  |
| Oral 5-ASA                                                               | 47 (22%)  | 21 (13%)  | 3 (50%)  | 18 (23%)            | 71 (19%)  | <del>0-021</del> |
| Topical 5-ASA                                                            | 3 (1%)    | 4 (2%)    | 1 (17%)  | 3 (4%)              | 8 (2%)    | <del>0-08</del>  |
| Immunomodulators                                                         | 118 (56%) | 81 (49%)  | 0        | 35 (44%)            | 199 (52%) | <del>0-019</del> |
| Anti-TNF Agents                                                          | 70 (33%)  | 40 (24%)  | 0        | 28 (35%)            | 110 (29%) | <del>0-075</del> |
| Systemic Steroids                                                        | 20 (9%)   | 21 (13%)  | 0        | 12 (15%)            | 41 (11%)  | <del>0-405</del> |
| Budesonide                                                               | 23 (11%)  | 11 (7%)   | 0        | 8 (10%)             | 34 (9%)   | <del>0-457</del> |
| <u>Ulcerative colitis</u>                                                |           |           |          |                     |           |                  |
| Oral 5-ASA                                                               | 83 (47%)  | 92 (61%)  | 10 (83%) | 32 (60%)            | 185 (54%) | <del>0-007</del> |
| Topical 5-ASA                                                            | 47 (26%)  | 43 (29%)  | 2 (17%)  | 15 (28%)            | 92 (27%)  | <del>0-820</del> |
| Immunomodulators                                                         | 66 (37%)  | 46 (31%)  | 3 (25%)  | 21 (40%)            | 115 (34%) | <del>0-460</del> |
| Anti-TNF Agents                                                          | 21 (12%)  | 9 (6%)    | 0        | 5 (9%)              | 30 (9%)   | <del>0-205</del> |
| Systemic Steroids                                                        | 31 (17%)  | 26 (17%)  | 2 (17%)  | 6 (11%)             | 59 (17%)  | <del>0-750</del> |
| Topical Steroids                                                         | 8 (4.5%)  | 8 (6%)    | 0        | 2(4%)               | 17 (5%)   | <del>0-747</del> |
| <b>Fistulas, abscesses or stenosis in CD</b>                             |           |           |          |                     |           |                  |
| Perianal fistula                                                         | 0         | 1 (1%)    | 0        | 0                   | 1 (0.5%)  | <del>0-654</del> |
| Other Fistula                                                            | 2 (1%)    | 1 (1%)    | 0        | 0                   | 3 (1%)    | <del>0-844</del> |
| Stenosis                                                                 | 12 (7%)   | 12 (8%)   | 0        | 4(8%)               | 24 (6%)   | <del>0-765</del> |
| <b>Need for surgery</b>                                                  |           |           |          |                     |           |                  |
| <u>Crohn disease</u>                                                     |           |           |          |                     |           |                  |
| Overall                                                                  | 141 (67%) | 107 (65%) | 4 (67%)  | 52 (65%)            | 252 (66%) | <del>0-992</del> |
| Small bowel surgery                                                      | 106 (27%) | 66 (21%)  | 5 (28%)  | 27(20%)             | 177 (46%) | <del>0-184</del> |
| Colon surgery                                                            | 31 (15%)  | 22 (13%)  | 1 (17%)  | 10 (13%)            | 54 (14%)  | <del>0-961</del> |
| <u>Ulcerative colitis</u>                                                | 43 (24%)  | 29 (19%)  | 2 (17%)  | 8 (15%)             | 74 (21%)  | <del>0-461</del> |
| <b>At least one hospitalization during last 12 months related to IBD</b> |           |           |          |                     |           |                  |
| All IBD                                                                  | 76 (20%)  | 50 (16%)  | 2 (13%)  |                     | 128 (18%) | <del>0-604</del> |
| Crohn disease                                                            | 42 (20%)  | 34 (21%)  | 1 (20%)  | 25 (19%)            | 77 (20%)  | <del>0-996</del> |
| Ulcerative colitis                                                       | 34 (19%)  | 16 (11%)  | 1 (9%)   | 16 (20%)<br>9 (18%) | 51 (15%)  | <del>0-181</del> |

19

20

21

22

23

24

25

26 **Table 4: Factors associated with (A) alcohol, (B) heavy drinking and (C) cannabis**  
 27 **consumption based on a multivariate logistic regression**

28 **(A)**

| <b>Outcome: alcohol consumption</b>   | <b>Odds ratio</b> | <b>95% Confidence interval</b> | <b>p-value</b> |
|---------------------------------------|-------------------|--------------------------------|----------------|
| <b>Diagnosis (UC)</b>                 | 0.73              | 0.49-1.07                      | 0.110          |
| <b>Gender (female)</b>                | 0.403             | 0.30-0.55                      | <b>0.001</b>   |
| <b>Age</b>                            |                   |                                |                |
| <b>0-29 years</b>                     | 0.68              | 0.30-1.55                      | 0.360          |
| <b>&gt;50 years</b>                   | 2.1               | 1.43-3.09                      | <b>0.001</b>   |
| <b>Smoker (active)</b>                | 1.33              | 0.92-1.91                      | 0.123          |
| <b>Current immunosuppressants</b>     | 0.80              | 0.59-1.1                       | 0.172          |
| <b>Current anti-TNF agents</b>        | 0.54              | 0.35-0.81                      | <b>0.003</b>   |
| <b>Disease duration</b>               | 0.99              | 0.98-1.1                       | 0.667          |
| <b>Hospitalization related to IBD</b> | 0.75              | 0.5-1.13                       | 0.170          |
| <b>Stenosis</b>                       | 0.72              | 0.5-1.05                       | 0.09           |
| <b>Location L1</b>                    | 0.76              | 0.5-1.22                       | 0.257          |
| <b>Location E3</b>                    | 1.08              | 0.62-1.88                      | 0.795          |
| <b>EIM peripheral</b>                 | 0.75              | 0.55-1.03                      | 0.074          |
| <b>Employed</b>                       | 1.62              | 1.04-2.53                      | <b>0.034</b>   |
| <b>Retired</b>                        | 1.60              | 0.84-3.02                      | 0.149          |
| <b>Disability</b>                     | 0.58              | 0.28-1.19                      | 0.138          |
| <b>Single</b>                         | 1.24              | 0.70-2.2                       | 0.46           |
| <b>Married</b>                        | 0.88              | 0.53-1.46                      | 0.63           |
| <b>Divorced</b>                       | 0.90              | 0.27-3.01                      | 0.87           |
| <b>Remission</b>                      | 0.99              | 0.73-1.34                      | 0.955          |

29

30

31 **(B)**

32

| <b>Outcome: Heavy drinker</b>     | <b>Odds ratio</b> | <b>95% Confidence interval</b> | <b>p-value</b> |
|-----------------------------------|-------------------|--------------------------------|----------------|
| <b>Gender (female)</b>            | 0.243             | 0.119-0.497                    | <0.001         |
| <b>Age (per year, linear)</b>     | 1.086             | 1.063-1.111                    | <0.001         |
| <b>Smoker (active)</b>            | 2.010             | 1.056-3.826                    | 0.033          |
| <b>Current immunosuppressants</b> | 0.357             | 0.174-0.732                    | 0.005          |
| <b>Currently unemployed</b>       | 4.364             | 1.356-14.039                   | 0.013          |

33

34

35  
36  
37  
38

(G)

| Outcome: use of cannabis       | Odds ratio | 95% Confidence interval | p-value      |
|--------------------------------|------------|-------------------------|--------------|
| Diagnosis(UC)                  | 1.1        | 0.63-1.92               | 0.737        |
| Gender (female)                | 0.50       | 0.32-0.77               | <b>0.002</b> |
| Age                            |            |                         |              |
| 0-29                           | 1.03       | 0.42-2.55               | 0.940        |
| >50                            | 0.61       | 0.35-1.06               | 0.082        |
| Smoker (active)                | 3.55       | 2.24-5.6                | <b>0.001</b> |
| Current immunosuppressants     | 0.85       | 0.55-1.32               | 0.477        |
| Currently anti-TNF agents      | 0.94       | 0.54-1.61               | 0.811        |
| Disease duration               | 0.98       | 0.95-1.01               | 0.259        |
| Hospitalisation related to IBD | 0.95       | 0.55-1.64               | 0.854        |
| Stenosis                       | 1.13       | 0.68-1.9                | 0.631        |
| Location L1                    | 1.31       | 0.72-2.4                | 0.37         |
| Location E3                    | 1.20       | 0.53-2.75               | 0.657        |
| ELM peripheral                 | 1.40       | 0.90-2.16               | 0.133        |
| Employed                       | 0.57       | 0.32-1.03               | 0.062        |
| Retired                        | 0.305      | 0.103-0.91              | <b>0.033</b> |
| Disability                     | 1.30       | 0.46-3.7                | 0.620        |
| Single                         | 0.81       | 0.39-1.71               | 0.589        |
| Married                        | 0.40       | 0.20-0.82               | <b>0.012</b> |
| Divorced                       | na         | na                      |              |
| Remission                      | 0.87       | 0.6-1.33                | 0.518        |

39  
40  
41  
42  
43  
44  
45  
46  
47  
48  
49

50

51

52

## Supplementary Tables

53

54 **Suppl. Table 1**

|                                                  | <b>Non<br/>drinkers<br/>(N=390)</b> | <b>Low to<br/>moderate<br/>drinkers<br/>(N=314)</b> | <b>Heavy<br/>drinkers<br/>(N=18)</b> | <b>Cannabis<br/>user<br/>(N=133)</b> | <b>Whole<br/>Swiss IBD<br/>cohort<br/>(N=722)</b> |
|--------------------------------------------------|-------------------------------------|-----------------------------------------------------|--------------------------------------|--------------------------------------|---------------------------------------------------|
| <b>Age (median +<br/>IQR)</b>                    | 50 (40-60)                          | 54 (45-65)                                          | 72 (62-75)                           | 43 (35-52)                           | 51 (40-61)                                        |
| <b>Female (%)</b>                                | 258 (66%)                           | 129 (41%)                                           | 5 (28%)                              | 65 (49%)                             | 392 (54%)                                         |
| <b>Male (%)</b>                                  | 132 (34%)                           | 185 (59%)                                           | 13 (72%)                             | 68 (51%)                             | 330 (46%)                                         |
| <b>BMI [kg/m<sup>2</sup>]<br/>(median + IQR)</b> | 23<br>(20.7-26.2)                   | 23<br>(21.1-25.5)                                   | 26<br>(25-28.7)                      | 23<br>(20.8-24.8)                    | 23<br>(20.9-25.8)                                 |
| <b>Associated<br/>addiction</b>                  |                                     |                                                     |                                      |                                      |                                                   |
| Current smoking<br>(%)                           | 78 (20%)                            | 64 (20%)                                            | 4 (22%)                              | 61 (46%)                             | 146 (20%)                                         |
| <b>Ethnicity</b>                                 |                                     |                                                     |                                      |                                      |                                                   |
| Caucasian (%)                                    |                                     |                                                     |                                      |                                      |                                                   |



|                               |           |           |          |           |           |
|-------------------------------|-----------|-----------|----------|-----------|-----------|
| Non-caucasian (%)             | 307 (79%) | 252 (80%) | 15 (83%) | 115 (86%) | 574 (80%) |
|                               | 70 (18%)  | 50 (16%)  | 3 (17%)  | 13 (10%)  | 123 (17%) |
| <b>Marital status</b>         |           |           |          |           |           |
| Single (%)                    | 130 (33%) | 91 (30%)  | 0        | 71 (53%)  | 221 (31%) |
| Married (%)                   | 203 (52%) | 172 (55%) | 13 (72%) | 40 (30%)  | 388 (54%) |
| Widowed(%)                    | 8 (2%)    | 6 (2%)    | 1 (6%)   | 0         | 15 (2%)   |
| Divorced (%)                  | 25 (6%)   | 26 (8%)   | 4 (22%)  | 13 (10%)  | 55 (8%)   |
| Separated (%)                 | 6 (2%)    | 3 (1%)    | 0        | 2 (2%)    | 9 (1%)    |
| <b>Professional status</b>    |           |           |          |           |           |
| Disability (%)                | 34 (9%)   | 16 (5%)   | 2 (11%)  | 9 (7%)    | 52 (7%)   |
| Fulltime job (%)              | 142 (36%) | 168 (54%) | 4 (22%)  | 54 (41%)  | 314 (43%) |
| Part-time job (%)             | 117 (30%) | 72 (23%)  | 3 (17%)  | 34 (26%)  | 192 (27%) |
| Several partial-time jobs (%) | 13 (3%)   | 10 (3%)   | 0 (0%)   | 5 (4%)    | 23 (3%)   |
| Jobless (%)                   | 9 (2%)    | 3 (1%)    | 2 (11%)  | 3 (2%)    | 14 (2%)   |
| Student (%)                   | 40 (10%)  | 26 (8%)   | 1 (6%)   | 26 (20%)  | 67 (9%)   |
|                               | 76 (20 %) | 39 (12%)  | 2 (11%)  | 13 (10%)  | 117 (16%) |

|               |          |          |         |        |          |    |
|---------------|----------|----------|---------|--------|----------|----|
| Housewife (%) | 50 (13%) | 40 (13%) | 8 (45%) | 9 (7%) | 98 (13%) | 55 |
| Retired (%)   |          |          |         |        |          | 56 |
|               |          |          |         |        |          | 57 |

58

**Suppl.**59 **Table 2**

## 60 Drinking Habits: modification since IBD diagnosis

|                             | Drink same | Stopped completely | Drink less | Drink more |
|-----------------------------|------------|--------------------|------------|------------|
| <b>Gender</b>               |            |                    |            |            |
| Male (175)                  | 110 (63%)  | 9 (5%)             | 48 (27%)   | 8 (5%)     |
| Female (172)                | 102 (59%)  | 11 (6%)            | 52 (30%)   | 7 (4%)     |
| <b>Age (y)</b>              | 48         | 51                 | 46         | 42         |
| <b>[median, IQR, range]</b> | 38-59      | 42-63              | 37-57      | 34-51      |
|                             | 20-79      | 25-81              | 21-88      | 26-59      |
| <b>Diagnosis</b>            |            |                    |            |            |
| CD (196)                    | 125 (64%)  | 13 (7%)            | 53 (27%)   | 5 (3%)     |
| UC/IC (151)                 | 87 (58%)   | 7 (5%)             | 47 (31%)   | 10 (7%)    |
| <b>Smoking status</b>       |            |                    |            |            |
| Non-smoker (111)            | 61 (56%)   | 10 (9%)            | 32 (29%)   | 8 (7%)     |
| Past (130)                  |            |                    |            |            |
| Current (99)                |            |                    |            | 3 (2%)     |

|  |          |        |          |        |
|--|----------|--------|----------|--------|
|  |          |        |          | 4 (4%) |
|  | 85 (65%) | 5 (4%) | 37 (29%) |        |
|  | 61 (62%) | 5 (5%) | 29 (29%) |        |

61

62 **Suppl. Table 3**

63 Evaluation of binge drinking frequency in the reassessment questionnaire

64 Based on the question: How often do you have six or more drinks on one occasion?

|                         | <b>Never</b> | <b>Less than<br/>monthly</b> | <b>Monthly</b> | <b>Weekly</b> | <b>Daily or<br/>almost</b> |
|-------------------------|--------------|------------------------------|----------------|---------------|----------------------------|
| <b>Gender</b>           |              |                              |                |               |                            |
| Male (178)              | 73 (41%)     | 60 (34%)                     | 31 (17%)       | 10 (6%)       | 4 (2%)                     |
| Female (197)            | 128 (65%)    | 53 (27%)                     | 13 (7%)        | 3 (2%)        | 0                          |
| <b>Age (y)</b>          | 50           | 47                           | 39             | 37            | 64                         |
| [median, IQR,<br>range] | 41-61        | 40-55                        | 31-50          | 28-59         | 56-69                      |
|                         | 20-88        | 20-83                        | 23-72          | 25-77         | 53-69                      |
| <b>Diagnosis</b>        |              |                              |                |               |                            |
| CD (212)                | 111 (52%)    | 64 (30.2%)                   | 27 (13%)       | 7 (3%)        | 3 (1%)                     |
| UC/IC (162)             | 90 (56%)     | 49 (30.2%)                   | 17 (11%)       | 6 (4%)        | 1 (1%)                     |
| <b>Smoking status</b>   |              |                              |                |               |                            |
| Non-smoker (121)        | 71 (59%)     | 38 (31%)                     | 8 (7%)         | 4 (3%)        | 0                          |
| Past (142)              | 73 (51%)     | 47 (33%)                     | 15 (11%)       | 5 (4%)        | 2 (1%)                     |
| Current (103)           | 52 (51%)     | 26 (25%)                     | 20 (19%)       | 3 (3%)        | 2 (2%)                     |

65

66

67

68
